# Supplementary material
Source: Royal Society of Chemistry journal article supplement (doi:10.1039/d5nr04491j)
Supplement: d5nr04491j1.pdf [file d5nr04491j1.pdf]

## Supporting Information

### Octadecene-free Colloidal Synthesis of CsPbI<sub>3</sub> Nanocrystals with Improved Size, Shape and Phase Control

Ruth Pinheiro Muniz,<sup>ab</sup> Julius Brunner,<sup>ab</sup> Anatol Prudnikau,<sup>b</sup> Falk Röder,<sup>b</sup> Shivam Singh,<sup>ab</sup> Raquel Dantas Campos,<sup>ab</sup> Axel Lubk,<sup>b</sup> Fabian Paulus,<sup>b</sup> and Yana Vaynzof<sup>\*ab</sup>

<sup>a</sup>Chair for Emerging Electronic Technologies TUD Dresden University of Technology Nöthnitzer Straße 61, 01187 Dresden, Germany

<sup>b</sup>Leibniz-Institute for Solid State and Materials Research Dresden, Helmholtzstraße 20, 01069 Dresden, Germany

Corresponding author:

Yana Vaynzof

E-mail: y.vaynzof@ifw-dresden.de

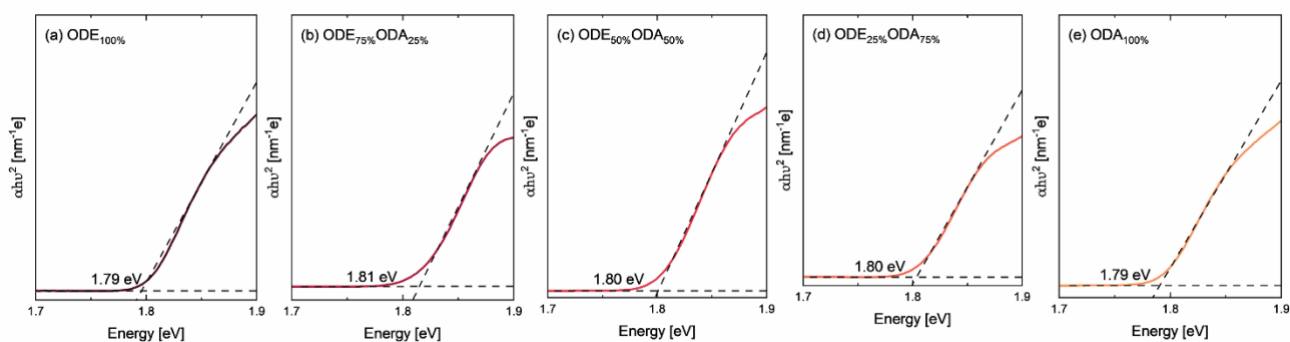

**Figure S1:** Tauc-plot for samples with estimated band-gap (a) ODE<sub>100%</sub> 1.79 eV, (b) ODE<sub>75%</sub>ODA<sub>25%</sub> 1.81 eV, (c) ODE<sub>50%</sub>ODA<sub>50%</sub> 1.80 eV, (d) ODE<sub>25%</sub>ODA<sub>75%</sub> 1.80 eV, and (e) ODA<sub>100%</sub> 1.79 eV.

**Table S1:** XPS results for a range of samples of CsPbI<sub>3</sub> showing the expected ratio of elements.

| XPS    | ODE <sub>100%</sub> | ODE <sub>75%</sub> ODA <sub>25%</sub> | ODE <sub>50%</sub> ODA <sub>50%</sub> | ODE <sub>25%</sub> ODA <sub>75%</sub> | ODA <sub>100%</sub> |
|--------|---------------------|---------------------------------------|---------------------------------------|---------------------------------------|---------------------|
| Pb (%) | 16,52               | 16,94                                 | 16,66                                 | 16,87                                 | 16,57               |
| Cs (%) | 20,61               | 20,24                                 | 21,07                                 | 20,11                                 | 20,49               |
| I (%)  | 62,87               | 62,82                                 | 62,27                                 | 63,02                                 | 62,94               |

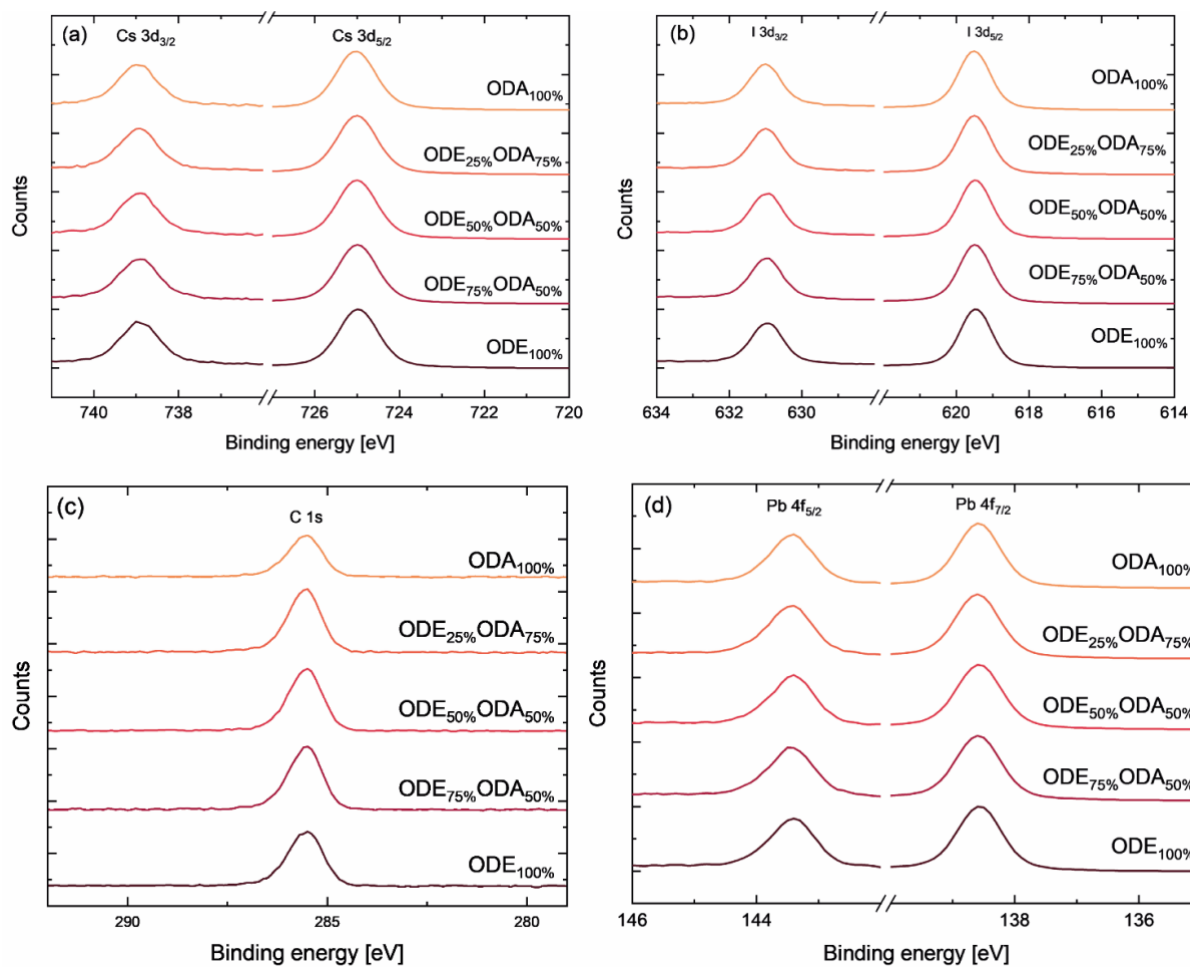**Figure S2:** XPS data shows no shift of the (a) Cs, (b) I, and (d) Pb peaks. No metallic lead was observed in the sample.

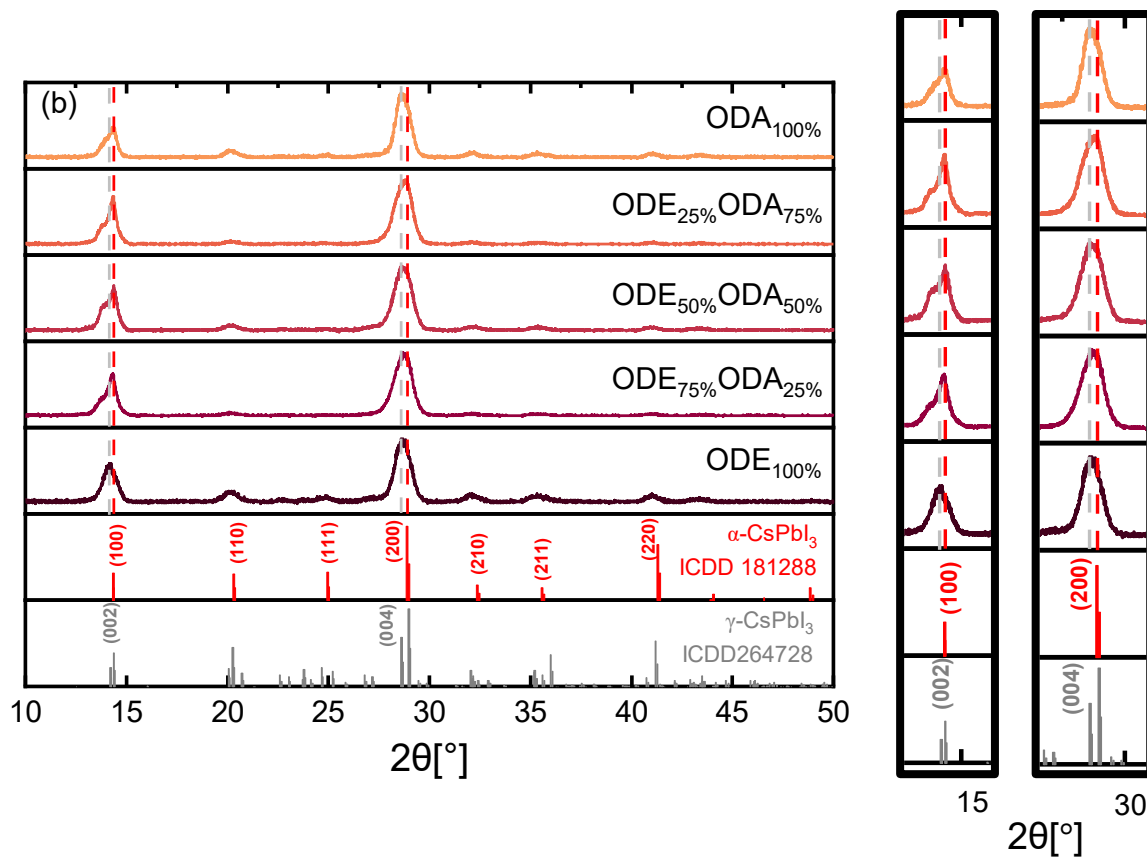

**Figure S3:** Zoom-in of the reflection peaks at 13-16° and 28-31° showing the shift on the central peak at 14° and 28°.

## Experimental measurement of the reciprocal lattice vectors and best fitting parameters

For the assessment of the fitting between the structural model and the experimental data, we define the  $\chi^2$  function by:

$$\chi^2 = \sum_i^N \frac{(q_{mod,i} - q_{meas,i})^2}{\Delta q_i^2} + \sum_i^{N-1} \frac{(\alpha_{mod,i} - \alpha_{meas,i})^2}{\Delta \alpha_i^2}$$

comparing the measured lengths of the reciprocal lattice vectors  $q_{meas,i}$  with the values derived from the corresponding structure models  $q_{mod,i}$  as well as the corresponding angles  $\alpha_{meas,i}$  between the vectors with the values  $\alpha_{mod,i}$  expected from the models. The weighting factors are determined by experimental limitations, including calibration and distortion uncertainties, as well as the finite pixel size. For each image,  $N = 4$  reflections were measured, leading to 4 length values and 3 angles. The experimental data and the best fitting model values are summarized in **Table S2**.

**Table S2:** Experimental data for the reciprocal lattice vectors measured in Fig. 4 b) and e) in comparison with the best fitting zone-axis of the structure model for the orthorhombic and cubic phase.

| Image 260211_CsPbI3_ODA_380kX_ap18_0179_sub_000 |             |         |           |                     |    |    |           |       |         |
|-------------------------------------------------|-------------|---------|-----------|---------------------|----|----|-----------|-------|---------|
| ODA cubic                                       | measurement |         |           | orthorhombic [-110] |    |    |           |       |         |
|                                                 | q*nm        | angle/° | angle_n/° | h                   | k  | l  | d/Angstr. | q*nm  | angle/° |
| 1                                               | 6,38        | 120,5   | 0         | 4                   | 4  | 0  | 1,544     | 6,477 | 0,0     |
| 2                                               | 4,56        | 75,8    | 44,7      | 2                   | 2  | -4 | 2,197     | 4,553 | 44,7    |
| 3                                               | 6,34        | 30,8    | 89,7      | 0                   | 0  | -8 | 1,563     | 6,399 | 90,0    |
| 4                                               | 4,49        | -14,4   | 134,9     | -2                  | -2 | -4 | 2,197     | 4,553 | 135,3   |
| <b>cubic [010]</b>                              |             |         |           |                     |    |    |           |       |         |
|                                                 |             |         |           | h                   | k  | l  | d/Angstr. | q*nm  | angle/° |
|                                                 |             |         |           | -4                  | 0  | 0  | 1,574     | 6,353 | 0,0     |
|                                                 |             |         |           | -2                  | 0  | -2 | 2,226     | 4,492 | 45,0    |
|                                                 |             |         |           | 0                   | 0  | 4  | 1,574     | 6,353 | 90,0    |
|                                                 |             |         |           | 2                   | 0  | -2 | 2,226     | 4,492 | 135,0   |

  

| Image 260211_CsPbI3_ODE_380kX_ap18_0219_sub_000 |             |         |           |                     |    |    |           |       |         |
|-------------------------------------------------|-------------|---------|-----------|---------------------|----|----|-----------|-------|---------|
| ODE cubic                                       | measurement |         |           | orthorhombic [-110] |    |    |           |       |         |
|                                                 | q*nm        | angle/° | angle_n/° | h                   | k  | l  | d/Angstr. | q*nm  | angle/° |
| 1                                               | 6,39        | 152,2   | 0         | 0                   | 0  | -8 | 1,563     | 6,399 | 0       |
| 2                                               | 3,56        | 88,8    | 63,4      | 2                   | 2  | -2 | 2,768     | 3,612 | 63,7    |
| 3                                               | 3,56        | -0,6    | 152,8     | 1                   | 1  | 4  | 2,789     | 3,586 | 153,2   |
| 4                                               | 3,56        | 36,3    | 115,9     | 2                   | 2  | 2  | 2,768     | 3,612 | 116,3   |
| <b>cubic [001]</b>                              |             |         |           |                     |    |    |           |       |         |
|                                                 |             |         |           | h                   | k  | l  | d/Angstr. | q*nm  | angle/° |
|                                                 |             |         |           | -4                  | 0  | 0  | 1,574     | 6,353 | 0       |
|                                                 |             |         |           | -1                  | 2  | 0  | 2,816     | 3,551 | 63,4    |
|                                                 |             |         |           | 2                   | -1 | 0  | 2,816     | 3,551 | 153,4   |
|                                                 |             |         |           | 1                   | 2  | 0  | 2,816     | 3,551 | 116,6   |

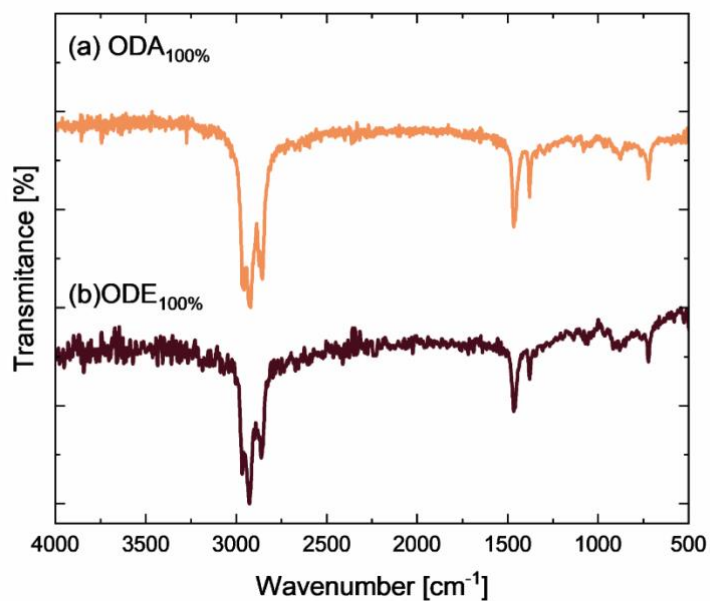

Figure S4: FTIR spectra measured on drop-cast (a) ODA and (b) ODE NCs.

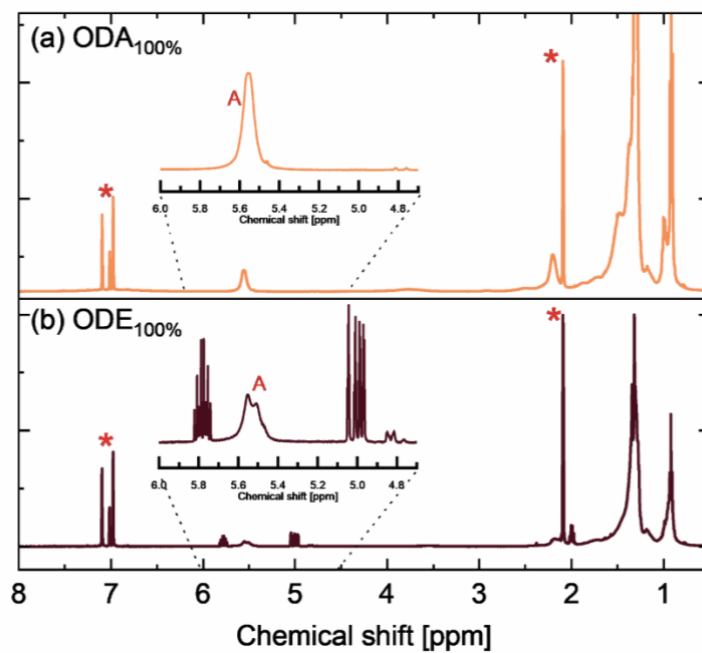

Figure S5: <sup>1</sup>H-NMR spectra in toluene-d<sub>8</sub>: marked with A are resonances attributed olefinic protons of OA and OLA bound to NCs surface, marked with \* are residual proton signals of toluene-d<sub>8</sub>.

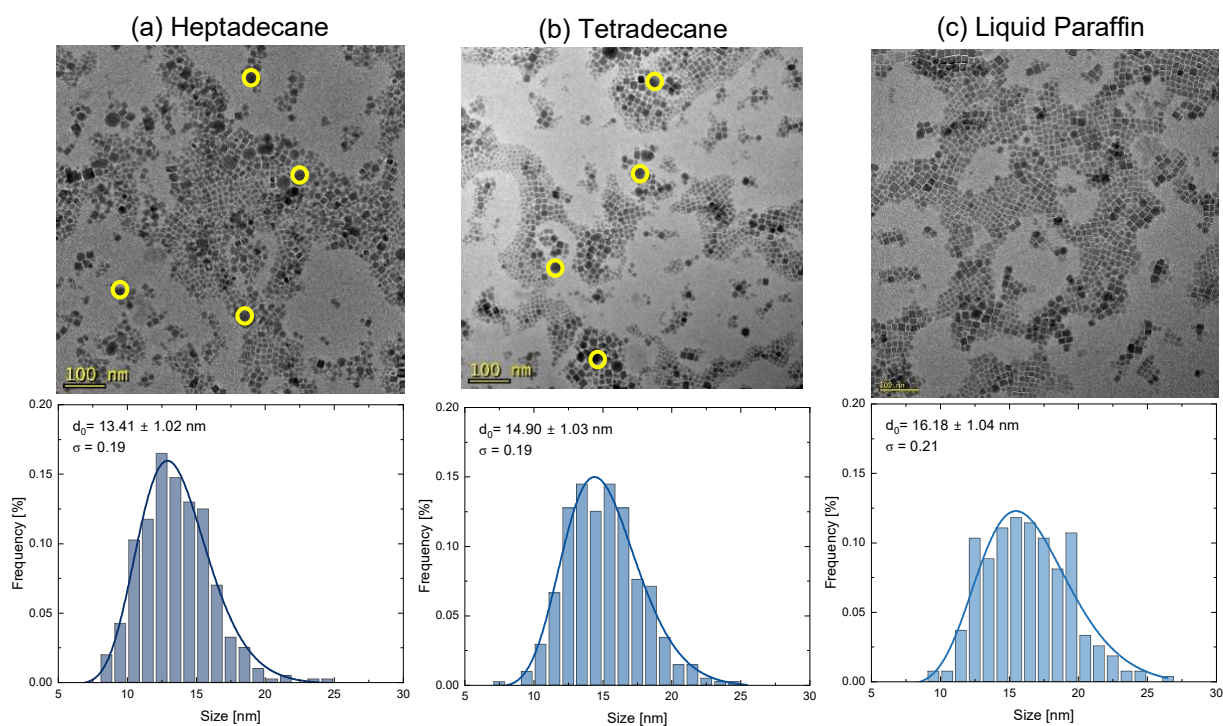

**Figure S6:** TEM images and size distribution analysis using different inert solvents (a) Heptadecane, (b) Tetradecane and (c) Liquid Paraffin.

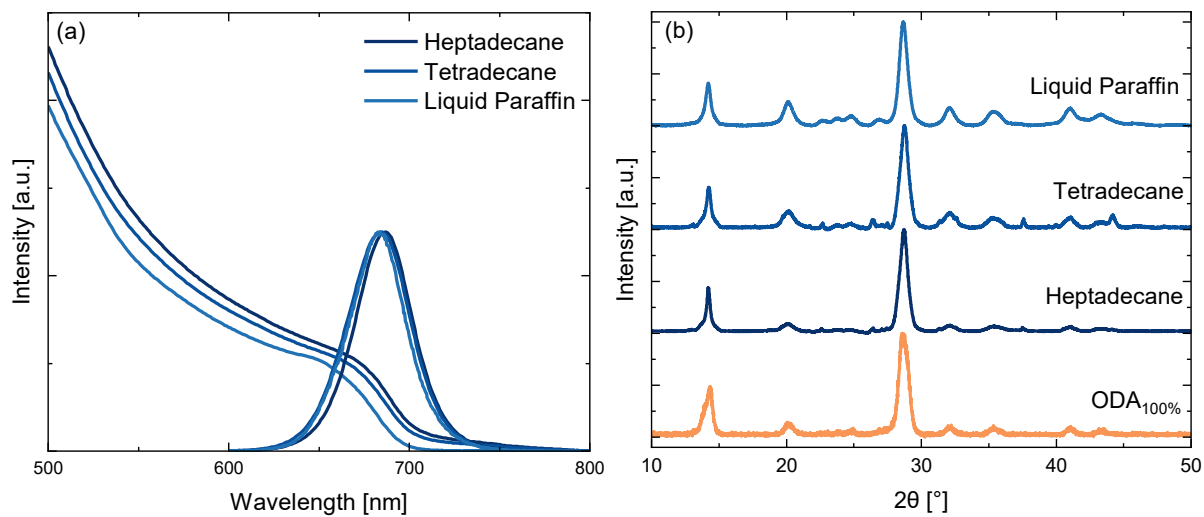

**Figure S7:** Normalized measurements of (a) steady-state PL and UV-vis, and (b) XRD diffractions using inert solvents. In (b) we have ODA<sub>100%</sub> as a comparison across those solvents.
